# Supplementary material
Source: PubMed Central journal article supplement (PMC5074080)

**Appendix Table 1.** Primary Outcomes of Interest

| <b>Quality of care outcomes</b>                                   | <b>Outcome measures</b>                                                                                                                                                                                                                                                                                                                                    |
|-------------------------------------------------------------------|------------------------------------------------------------------------------------------------------------------------------------------------------------------------------------------------------------------------------------------------------------------------------------------------------------------------------------------------------------|
| Screening and other preventive care services completed or ordered | Screening for hypertension, hyperlipidemia, and diabetes in people not diagnosed with a CVD risk factor. Other preventive care services included providing aspirin (when appropriate), providing smoking cessation counseling, and nutrition and physical activity assessments included in USPSTF recommendations. <sup>18-22</sup>                        |
| Clinical tests completed or ordered                               | Clinical tests from evidence-based guidelines and protocols for management of hypertension, hyperlipidemia, or diabetes.<br><br>Examples: hemoglobin A1C testing every 6 months for patients with diabetes <sup>6</sup> ; blood pressure and cholesterol testing for patients diagnosed with hypertension and hyperlipidemia, respectively. <sup>7,8</sup> |
| Treatments prescribed                                             | Recommendations to initiate, intensify, or change existing medications for patients with hypertension, hyperlipidemia, or diabetes, based on clinical guidelines.                                                                                                                                                                                          |
| <b>CVD risk factor outcomes</b>                                   |                                                                                                                                                                                                                                                                                                                                                            |
| Blood pressure outcomes                                           | Proportion of patients with their BP controlled (usually defined as $\leq 140/90$ mmHg and $\leq 130/80$ mmHg for people with diabetes) <sup>8</sup><br>Change in mean SBP<br>Change in mean DBP                                                                                                                                                           |
| Lipid outcomes                                                    | Proportion of patients achieving established targets (or better) for TC, LDL-cholesterol, HDL-cholesterol, and triglycerides <sup>23</sup><br>Changes in mean TC, LDL-cholesterol, HDL-cholesterol, and triglycerides                                                                                                                                      |
| Diabetes outcomes                                                 | Proportion of patients achieving A1C control (usually defined as $\leq 7\%$ ) <sup>6</sup><br>Changes in mean A1C level<br>Changes in mean blood glucose levels                                                                                                                                                                                            |
| <b>Other primary outcomes</b>                                     |                                                                                                                                                                                                                                                                                                                                                            |
| Morbidity, mortality, and patient-centered outcomes               | Incidence of heart attacks and strokes<br>CVD-related hospitalizations and ED visits<br>Patient satisfaction with care<br>Health-related quality of life                                                                                                                                                                                                   |

BP, blood pressure; DBP, diastolic blood pressure; ED, emergency department; HDL, high-density lipoprotein; LDL, low-density lipoprotein; SBP, systolic blood pressure; TC, total cholesterol.

**Appendix Table 2.** Calculation of Individual Study Effect Estimates for Primary and Secondary Outcomes

| <b>Effect estimate</b>                               | <b>Formula</b>                                                                                                                    |
|------------------------------------------------------|-----------------------------------------------------------------------------------------------------------------------------------|
| Absolute percentage point change <sup>a,b</sup>      | $(\text{CDSS Prop}_{\text{post}} - \text{CDSS Prop}_{\text{pre}}) - (\text{UC Prop}_{\text{post}} - \text{UC Prop}_{\text{pre}})$ |
| Difference-in-differences of the mean <sup>a,b</sup> | $(\text{CDSS } M_{\text{post}} - \text{CDSS } M_{\text{pre}}) - (\text{UC } M_{\text{post}} - \text{UC } M_{\text{pre}})$         |

<sup>a</sup>For studies reporting multiple intervention arms, effect estimates were calculated for each arm and reported separately.

<sup>b</sup>When studies reported multiple outcome measures (e.g., studies reporting multiple types of clinical tests), effect estimates for each measure were calculated and reported separately.

CDSS, clinical decision-support system; Prop, proportion of patients achieving desired outcome; Post, measurement from last available time point with ongoing CDSS; Pre, last measurement before intervention; UC, usual care; M, mean, average for patient group.

**Appendix Table 3.** Changes in Blood Pressure, Lipid, and Diabetes Outcomes Attributable to Clinical Decision-Support Systems

| Outcome type                                                            | Number of studies                                    | Median effect estimate<br>(IQR) |
|-------------------------------------------------------------------------|------------------------------------------------------|---------------------------------|
| <b>Blood pressure outcomes</b>                                          |                                                      |                                 |
| Improvement in proportion of patients with BP at goal <sup>a</sup>      | 8 <sup>25,33,39,41,52,63,65,82</sup>                 | +2.0 pct pts<br>(-5.0, 10.5)    |
| Reduction in SBP                                                        | 14 <sup>25,26,37-39,41,45,50,51,58,63,65,83,85</sup> | -0.89 mmHg<br>(-1.93, 1.0)      |
| Reduction in DBP                                                        | 11 <sup>26,38,39,41,45,50,51,65,71,83,85</sup>       | -0.30 mmHg<br>(-1.13, 1.0)      |
| <b>Lipid outcomes</b>                                                   |                                                      |                                 |
| Improvement in proportion of patients with lipid at goal <sup>b</sup>   | 9 <sup>26,33,41,45,65,81,82,85,92</sup>              | +1.0 pct pts<br>(-1.25, 4.55)   |
| Reduction in total cholesterol                                          | 5 <sup>26,27,37,38,84</sup>                          | 0 mg/dL<br>(-7.35, 4.4)         |
| Reduction in LDL cholesterol                                            | 10 <sup>26,27,29,41,45,58,65,83-85</sup>             | -0.5 mg/dL<br>(-2.4, 0.2)       |
| Improvement in HDL cholesterol                                          | 3 <sup>26,27,84</sup>                                | -0.27 mg/dL<br>(NA)             |
| Reduction in triglycerides                                              | 2 <sup>27,84</sup>                                   | -21.4 mg/dL<br>(NA)             |
| <b>Diabetes outcome</b>                                                 |                                                      |                                 |
| Improvement in the proportion of patients with A1C at goal <sup>c</sup> | 8 <sup>26,33,41,45,65,82,85,92</sup>                 | -1.3 pct pts<br>(-2.15, 4.23)   |
| Reduction in A1C level                                                  | 11 <sup>26,29,38,41,45,52,58,65,83-85</sup>          | -0.12%<br>(-0.28, 0)            |

<sup>a</sup>Absolute percentage point increase in proportion of patients achieving goal BP.

<sup>b</sup>Absolute percentage point increase in proportion of patients achieving goal lipid levels.

<sup>c</sup>Absolute percentage point increase in proportion of patients achieving goal A1c levels.

BP, blood pressure; DBP, diastolic blood pressure; HDL, high-density lipoprotein; IQR, interquartile interval; LDL, low-density lipoprotein; NA, not applicable; pct pts, percentage points; SBP, systolic blood pressure.

**Appendix Table 4.** Changes in Quality of Care Outcomes from Studies Examining Clinical Decision-Support Systems Combined with Other Interventions

| Additional intervention delivered | Quality of care outcome                                           | Study author (year)           | Quality of care findings <sup>a</sup>                                                                                                                                                                                                                                                                                                                                                          |
|-----------------------------------|-------------------------------------------------------------------|-------------------------------|------------------------------------------------------------------------------------------------------------------------------------------------------------------------------------------------------------------------------------------------------------------------------------------------------------------------------------------------------------------------------------------------|
| Team-based care                   | Screening and other preventive care services completed or ordered | Holbrook (2011) <sup>83</sup> | <ul style="list-style-type: none"> <li>• Change in total process composite score (95% CI): +4.7 (3.63 to 5.71)</li> </ul>                                                                                                                                                                                                                                                                      |
|                                   | Clinical tests completed or ordered                               | Dorr (2005) <sup>29</sup>     | <ul style="list-style-type: none"> <li>• HbA1c testing completed: OR (95% CI): 1.5 (1.3 to 1.7)</li> <li>• LDL testing completed: OR (95% CI): 1.3 (1.0 to 1.6)</li> </ul>                                                                                                                                                                                                                     |
|                                   |                                                                   | O'Connor (2005) <sup>52</sup> | <ul style="list-style-type: none"> <li>• Prop of patients with <math>\geq 2</math> HbA1c tests: +33.0 pct pts (<math>p=0.002</math>)</li> <li>• Prop of patients with <math>\geq 1</math> LDL test: +16.0 pct pts (<math>p=0.12</math>)</li> <li>• Prop of patients with <math>\geq 2</math> HbA1c tests and with <math>\geq 1</math> LDL test: +25.0 pct pts (<math>p=0.03</math>)</li> </ul> |
|                                   |                                                                   | Hicks (2008) <sup>39</sup>    | <ul style="list-style-type: none"> <li>• Prop of patients with recommended drug class prescribed: +2.0 pct pts (<math>p&lt;0.001</math>)</li> </ul>                                                                                                                                                                                                                                            |
|                                   | Treatments prescribed                                             | Murray (2004) <sup>51</sup>   | <ul style="list-style-type: none"> <li>• Prop of patients prescribed antihypertensive medications (95% CI)</li> <li>• Arm 1: Pharmacist + CDSS vs. UC: -2.0 pct pts (-1.90 to 7.90)</li> <li>• Arm 2: Pharmacist + MD + CDSS vs. UC: +2.0 pct pts (-7.80 to 11.80)</li> </ul>                                                                                                                  |

**Appendix**  
**Clinical Decision Support Systems and Prevention: A Community Guide Cardiovascular Disease Systematic Review**  
**Njie et al.**

|                   |                                                                   |                               |                                                                                                                                                                                                                                                                                                                                                                                                                                                                                                                                                           |
|-------------------|-------------------------------------------------------------------|-------------------------------|-----------------------------------------------------------------------------------------------------------------------------------------------------------------------------------------------------------------------------------------------------------------------------------------------------------------------------------------------------------------------------------------------------------------------------------------------------------------------------------------------------------------------------------------------------------|
| Patient reminders | Screening and other preventive care services completed or ordered | Holbrook (2009) <sup>41</sup> | <ul style="list-style-type: none"> <li>• Change in BP process composite score: +0.61 (<math>p&lt;0.001</math>)</li> <li>• Change in BMI process composite score: +0.71 (<math>p&lt;0.001</math>)</li> <li>• Change in exercise process composite score: +0.91 (<math>p&lt;0.001</math>)</li> <li>• Change in diet process composite score: +0.88 (<math>p&lt;0.001</math>)</li> <li>• Change in aspirin process composite score: +0.05 (<math>p=0.02</math>)</li> <li>• Change in smoking process composite score: +0.03 (<math>p=0.09</math>)</li> </ul> |
|                   |                                                                   | Ornstein (1991) <sup>53</sup> | <ul style="list-style-type: none"> <li>• Prop of patients receiving cholesterol screening               <ul style="list-style-type: none"> <li>• Arm 1: CDSS vs UC: +9.10 pct pts (<math>p&lt;0.001</math>)</li> <li>• Arm 2: CDSS + patient reminder vs UC: +18.6 pct pts (<math>p&lt;0.001</math>)</li> </ul> </li> </ul>                                                                                                                                                                                                                               |

<sup>a</sup>Findings are individual effect estimates (absolute percentage point difference or difference-in-differences of the mean or odds ratios) on the effectiveness of a CDSS intervention compared with usual care.

BP, blood pressure; CDSS, clinical decision-support system; pct pts, percentage points; Prop, proportion; UC, usual care

**Appendix**  
**Clinical Decision Support Systems and Prevention: A Community Guide Cardiovascular Disease Systematic Review**  
**Njie et al.**

**Appendix Table 5.** CDSS Contextual Factors and Features for Health Process Outcomes

| <b>Contextual factor/feature</b>                                                | <b>Number of studies reporting (% of included studies) N=45</b> | <b>Number of studies reporting favorable outcome measures for screening and other preventive services (% of total studies reporting outcome) n=17</b> | <b>Number of studies reporting favorable outcome measures for clinical tests ordered (% of total studies reporting outcome) n=7</b> | <b>Number of studies reporting favorable outcome measures for treatments prescribed (% of total studies) n=11</b> |
|---------------------------------------------------------------------------------|-----------------------------------------------------------------|-------------------------------------------------------------------------------------------------------------------------------------------------------|-------------------------------------------------------------------------------------------------------------------------------------|-------------------------------------------------------------------------------------------------------------------|
| Integration with charting or order entry system to support workflow integration | 33 (73.3)                                                       | 9 (52.9)                                                                                                                                              | 3 (42.9)                                                                                                                            | 5 (45.5)                                                                                                          |
| Automatic provision of decision support as part of clinician workflow           | 38 (84.4)                                                       | 10 (58.8)                                                                                                                                             | 4 (57.1)                                                                                                                            | 6 (54.5)                                                                                                          |
| No need for additional clinician data entry                                     | 24 (53.3)                                                       | 6 (35.3)                                                                                                                                              | 2 (28.5)                                                                                                                            | 5 (45.5)                                                                                                          |
| Request documentation of the reason for not following CDSS                      | 4 (8.9)                                                         | 2 (11.8)                                                                                                                                              | 1 (14.3)                                                                                                                            | 0 (0)                                                                                                             |
| Provision of decision support at time and location of decision making           | 35 (77.8)                                                       | 9 (52.9)                                                                                                                                              | 3 (42.9)                                                                                                                            | 6 (54.5)                                                                                                          |
| Recommendations executed by noting agreement                                    | 3 (6.7)                                                         | 2 (11.8)                                                                                                                                              | 0 (0)                                                                                                                               | 1 (9.1)                                                                                                           |
| Provision of a recommendation not just an assessment                            | 41 (91.1)                                                       | 10 (58.8)                                                                                                                                             | 5 (71.4)                                                                                                                            | 7 (63.6)                                                                                                          |
| Promotion of action rather than inaction                                        | 15 (33.3)                                                       | 4 (23.5)                                                                                                                                              | 1 (14.3)                                                                                                                            | 3 (27.2)                                                                                                          |
| Justification of decision support via provision of reasoning                    | 8 (17.8)                                                        | 1 (5.9)                                                                                                                                               | 0 (0)                                                                                                                               | 1 (9.1)                                                                                                           |
| Justification of decision support via provision of research evidence            | 11 (24.4)                                                       | 1 (5.9)                                                                                                                                               | 1 (14.3)                                                                                                                            | 1 (9.1)                                                                                                           |
| Local user involvement in development process                                   | 18 (40)                                                         | 2 (11.8)                                                                                                                                              | 2 (28.6)                                                                                                                            | 1 (9.1)                                                                                                           |

**Appendix**  
**Clinical Decision Support Systems and Prevention: A Community Guide Cardiovascular Disease Systematic Review**  
**Njie et al.**

|                                                                        |           |          |          |          |
|------------------------------------------------------------------------|-----------|----------|----------|----------|
| Provision of decision support results to patients as well as providers | 8 (17.8)  | 2 (11.8) | 1 (14.3) | 1 (9.1)  |
| CDSS accompanied by periodic performance feedback                      | 11 (22.9) | 2 (11.8) | 1 (14.3) | 2 (18.1) |
| CDSS accompanied by conventional education                             | 12 (25)   | 4 (23.5) | 0 (0)    | 3 (27.2) |

**Appendix Figure 1.** Analytic framework: clinical decision-support systems for cardiovascular disease prevention.

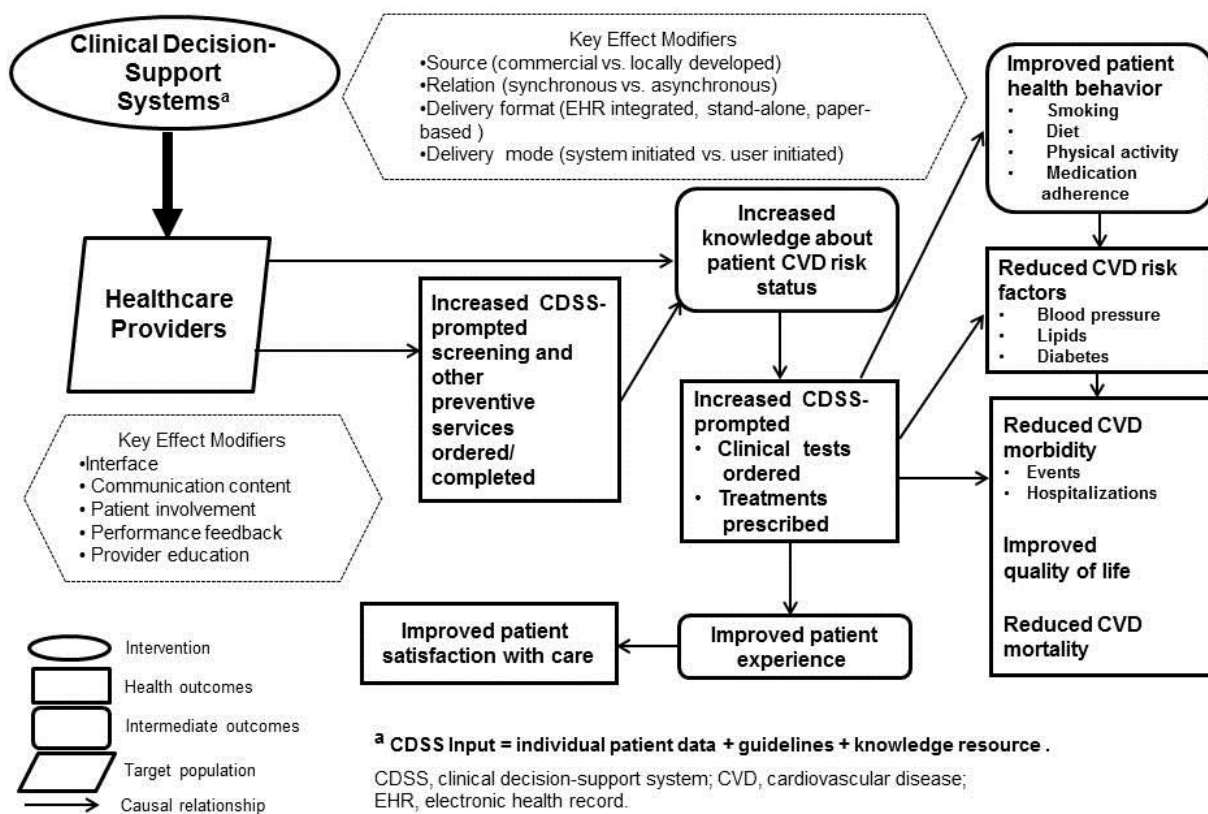



**Appendix Figure 2.** Search process.

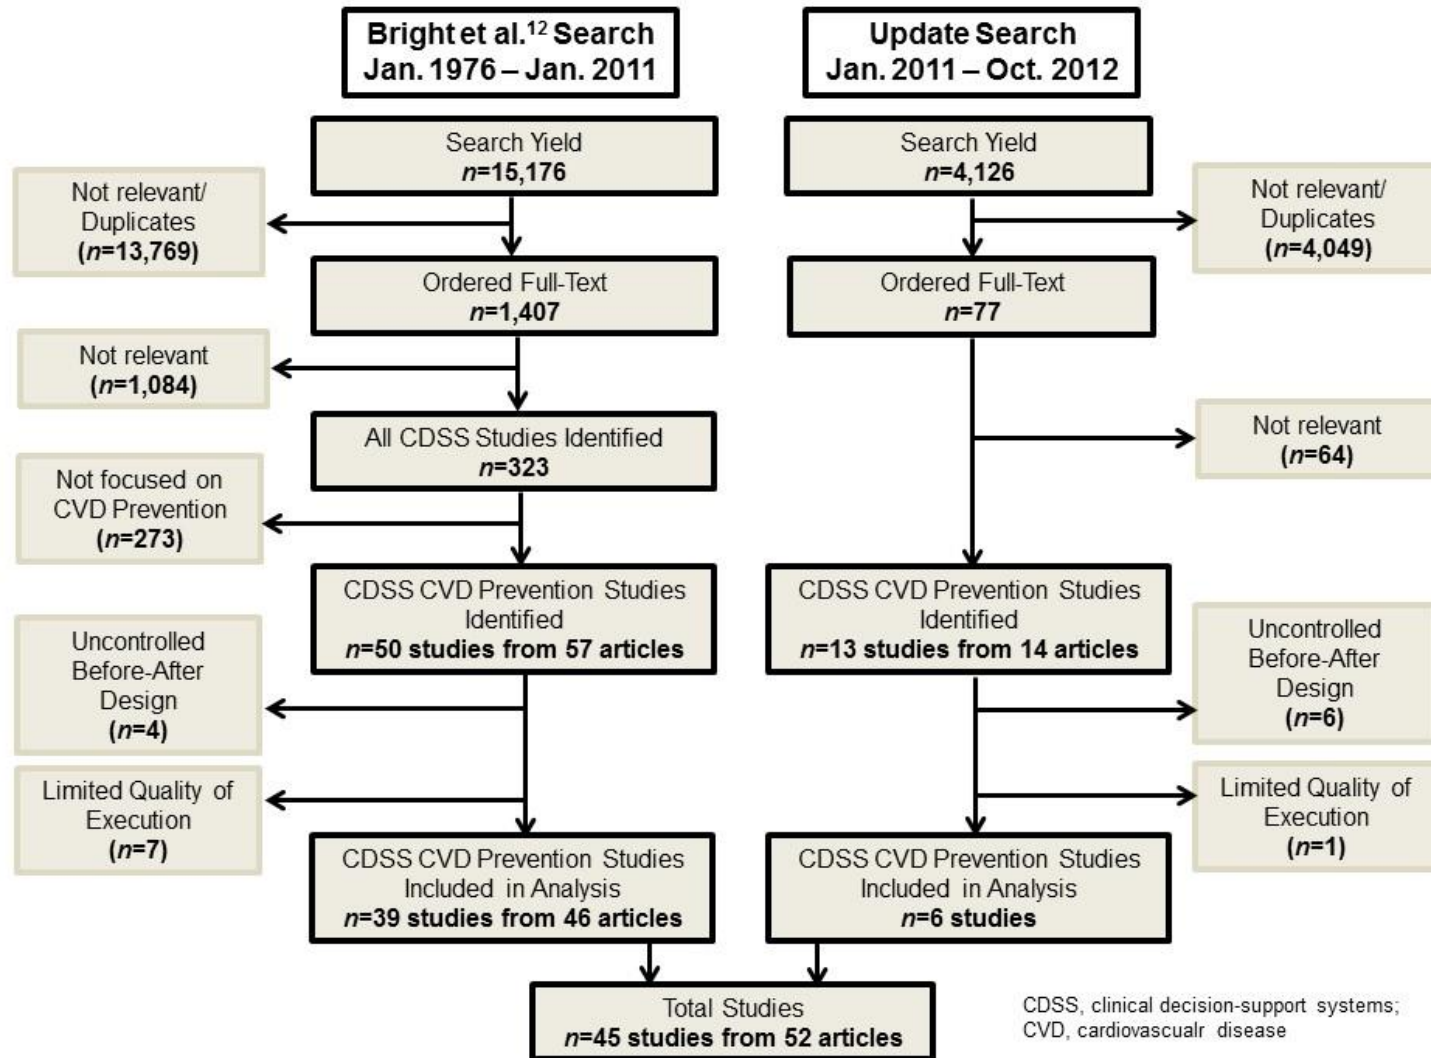

Supplement: NIHMS765197-supplement-1.pdf [file NIHMS765197-supplement-1.pdf]
